# Supplementary material
Source: PubMed Central journal article supplement (PMC10077128)
Supplement: jamasurg-e228380-s001.pdf [file jamasurg-e228380-s001.pdf]

## Data Sharing Statement

Agoubi. Patterns in Location of Death From Firearm Injury in the US. *JAMA Surg.* Published April 05, 2023. doi:10.1001/jamasurg.2022.8380

### Data

**Data available:** No

### Additional Information

**Explanation for why data not available:** The data is publicly available through CDC WONDER
